# Supplementary material
Source: PubMed Central journal article supplement (PMC2931719)
Supplement: mmc1.pdf [file mmc1.pdf]

Biophysical Journal, Volume 99

**Supporting Material**

**A Method for Removing Effects of Non-Specific Binding on the Distribution of Binding Stoichiometries: Application to Mass-Spectroscopy Data**

Liat Shimon, Michal Sharon, and Amnon Horovitz

## Calculation of binding constants

Four independent experiments were carried out in order to calculate the binding constants from the plots in Fig. 3. In what follows, we provide the raw data and calculations corresponding to one out of the four experiments. The average error in the intensities is about 2% and in the ratios of intensities it is about 3%.

**Table 1: Measured peak areas obtained after titration of CK with ADP.** The peak areas for the free CK ( $I_0$ ) and its ligand-bound states ( $I_{n \geq 1}$ ) were calculated using a deconvolution algorithm (peakfit v4, Jandel Scientific). For each concentration, peak areas for the  $18^+$ ,  $19^+$  and  $20^+$  charge states are indicated.

| 5 $\mu\text{M}$ | $I_0$    | $I_1$   |
|-----------------|----------|---------|
| $18^+$          | 5806400  | 1455700 |
| $19^+$          | 14996000 | 4141100 |
| $20^+$          | 8602800  | 2079900 |

| 10 $\mu\text{M}$ | $I_0$   | $I_1$   | $I_2$  |
|------------------|---------|---------|--------|
| $18^+$           | 732260  | 504890  | 140380 |
| $19^+$           | 1868100 | 1272100 | 330080 |
| $20^+$           | 696660  | 442870  | 123290 |

| 15 $\mu\text{M}$ | $I_0$   | $I_1$  | $I_2$  |
|------------------|---------|--------|--------|
| $18^+$           | 97151   | 68814  | 14916  |
| $19^+$           | 977620  | 800160 | 176420 |
| $20^+$           | 1130300 | 871970 | 207040 |

| 20 $\mu\text{M}$ | $I_0$   | $I_1$   | $I_2$  | $I_3$ |
|------------------|---------|---------|--------|-------|
| $18^+$           | 305720  | 364980  | 140710 | 14586 |
| $19^+$           | 1091700 | 1371000 | 486200 | 56304 |
| $20^+$           | 495590  | 569690  | 215530 | 16623 |

| 30 $\mu\text{M}$ | $I_0$  | $I_1$   | $I_2$  | $I_3$  | $I_4$ |
|------------------|--------|---------|--------|--------|-------|
| $18^+$           | 255600 | 504500  | 346490 | 85742  | 14510 |
| $19^+$           | 607900 | 1244400 | 797630 | 204080 | 47832 |
| $20^+$           | 223430 | 402780  | 302640 | 71914  | 12142 |

| 40 $\mu\text{M}$ | $I_0$ | $I_1$ | $I_2$ | $I_3$ | $I_4$ |
|------------------|-------|-------|-------|-------|-------|
| 18 <sup>+</sup>  | 30736 | 70566 | 76879 | 43399 | 19131 |
| 19 <sup>+</sup>  | 38720 | 87024 | 79648 | 41428 | 17175 |
| 20 <sup>+</sup>  | 3272  | 7125  | 7438  | 3706  | 1481  |

| 50 $\mu\text{M}$ | $I_0$  | $I_1$  | $I_2$   | $I_3$  | $I_4$  | $I_5$ |
|------------------|--------|--------|---------|--------|--------|-------|
| 18 <sup>+</sup>  | 55784  | 319750 | 554260  | 331720 | 136960 | 32527 |
| 19 <sup>+</sup>  | 127450 | 751320 | 1199300 | 702350 | 274280 | 94116 |
| 20 <sup>+</sup>  | 44138  | 220620 | 423010  | 247420 | 107550 | 28810 |

| 100 $\mu\text{M}$ | $I_0$ | $I_1$  | $I_2$  | $I_3$  | $I_4$  | $I_5$ |
|-------------------|-------|--------|--------|--------|--------|-------|
| 18 <sup>+</sup>   | 10007 | 111980 | 257520 | 183310 | 82153  | 20927 |
| 19 <sup>+</sup>   | 20874 | 245640 | 542880 | 408940 | 199750 | 67062 |
| 20 <sup>+</sup>   | 4611  | 50672  | 145340 | 98654  | 45977  | 10672 |

**Table 2: Calculation of the average non-specific binding constant ( $K_n$ ).**

| 30 $\mu\text{M}$ | 18 <sup>+</sup> | 19 <sup>+</sup> | 20 <sup>+</sup> |
|------------------|-----------------|-----------------|-----------------|
| $I_4/I_3 =$      | 0.17            | 0.23            | 0.17            |

| 40 $\mu\text{M}$ | 18 <sup>+</sup> | 19 <sup>+</sup> | 20 <sup>+</sup> |
|------------------|-----------------|-----------------|-----------------|
| $I_4/I_3 =$      | 0.44            | 0.41            | 0.40            |

| 50 $\mu\text{M}$ | 18 <sup>+</sup> | 19 <sup>+</sup> | 20 <sup>+</sup> |
|------------------|-----------------|-----------------|-----------------|
| $I_4/I_3 =$      | 0.41            | 0.39            | 0.43            |
| $I_5/I_4 =$      | 0.24            | 0.34            | 0.27            |

| 100 $\mu\text{M}$ | 18 <sup>+</sup> | 19 <sup>+</sup> | 20 <sup>+</sup> |
|-------------------|-----------------|-----------------|-----------------|
| $I_4/I_3 =$       | 0.45            | 0.49            | 0.47            |
| $I_5/I_4 =$       | 0.25            | 0.34            | 0.23            |

| $\mu\text{M}$ | 30    | 40    | 50    | 100   | Average | STD   |
|---------------|-------|-------|-------|-------|---------|-------|
| $K_n$         | 0.006 | 0.011 | 0.007 | 0.004 | 0.007   | 0.003 |

**Table 3: Correction of nonspecific binding effects on the distribution of binding stoichiometries (Eq. 8).**

| 5 $\mu\text{M}$ | $C_0/[E]$ | $C_1/[E]$ | $C_2/[E]$ |
|-----------------|-----------|-----------|-----------|
| 18+             | 1.04      | 0.22      | 0         |
| 19+             | 1.04      | 0.25      | 0         |
| 20+             | 1.04      | 0.21      | 0         |
| Average         | 1.04      | 0.23      | 0         |

| 10 $\mu\text{M}$ | $C_0/[E]$ | $C_1/[E]$ | $C_2/[E]$ |
|------------------|-----------|-----------|-----------|
| 18+              | 1.07      | 0.67      | 0.15      |
| 19+              | 1.07      | 0.66      | 0.14      |
| 20+              | 1.07      | 0.61      | 0.14      |
| Average          | 1.07      | 0.64      | 0.15      |

| 15 $\mu\text{M}$ | $C_0/[E]$ | $C_1/[E]$ | $C_2/[E]$ |
|------------------|-----------|-----------|-----------|
| 18+              | 1.12      | 0.67      | 0.09      |
| 19+              | 1.12      | 0.80      | 0.11      |
| 20+              | 1.12      | 0.74      | 0.11      |
| Average          | 1.12      | 0.74      | 0.10      |

| 20 $\mu\text{M}$ | $C_0/[E]$ | $C_1/[E]$ | $C_2/[E]$ |
|------------------|-----------|-----------|-----------|
| 18+              | 1.16      | 1.22      | 0.34      |
| 19+              | 1.16      | 1.30      | 0.31      |
| 20+              | 1.16      | 1.17      | 0.32      |
| Average          | 1.16      | 1.23      | 0.32      |

| 30 $\mu\text{M}$ | $C_0/[E]$ | $C_1/[E]$ | $C_2/[E]$ |
|------------------|-----------|-----------|-----------|
| 18+              | 1.27      | 2.23      | 1.19      |
| 19+              | 1.27      | 2.32      | 1.11      |
| 20+              | 1.27      | 2.02      | 1.23      |
| Average          | 1.27      | 2.19      | 1.18      |

| 40 $\mu\text{M}$ | $C_0/[E]$ | $C_1/[E]$ | $C_2/[E]$ |
|------------------|-----------|-----------|-----------|
| 18+              | 1.39      | 2.80      | 2.57      |
| 19+              | 1.39      | 2.73      | 1.97      |
| 20+              | 1.39      | 2.63      | 2.30      |
| Average          | 1.39      | 2.72      | 2.28      |

| 50 $\mu\text{M}$ | $C_0/[E]$ | $C_1/[E]$ | $C_2/[E]$ |
|------------------|-----------|-----------|-----------|
| 18+              | 1.54      | 8.26      | 12.14     |
| 19+              | 1.54      | 8.52      | 11.24     |
| 20+              | 1.54      | 7.14      | 11.99     |
| Average          | 1.54      | 7.97      | 11.79     |

| 100 $\mu\text{M}$ | $C_0/[E]$ | $C_1/[E]$ | $C_2/[E]$ |
|-------------------|-----------|-----------|-----------|
| 18+               | 2.94      | 30.85     | 49.64     |
| 19+               | 2.94      | 32.55     | 49.28     |
| 20+               | 2.94      | 30.27     | 66.08     |
| Average           | 2.94      | 31.22     | 55.00     |

**Table 4: The corrected ligand-bound concentrations** (using Eq. 9 and given that  $C_T = 4 \mu\text{M}$ ).

| 5 $\mu\text{M}$ | $C_0$ | $C_1$ | $C_2$ |
|-----------------|-------|-------|-------|
| 18+             | 3.29  | 0.71  | 0     |
| 19+             | 3.22  | 0.78  | 0     |
| 20+             | 3.31  | 0.69  | 0     |
| Average         | 3.28  | 0.72  | 0     |

| 10 $\mu\text{M}$ | $C_0$ | $C_1$ | $C_2$ |
|------------------|-------|-------|-------|
| 18 <sup>+</sup>  | 2.27  | 1.41  | 0.33  |
| 19 <sup>+</sup>  | 2.30  | 1.40  | 0.30  |
| 20 <sup>+</sup>  | 2.36  | 1.33  | 0.31  |
| Average          | 2.31  | 1.38  | 0.31  |

| 15 $\mu\text{M}$ | $C_0$ | $C_1$ | $C_2$ |
|------------------|-------|-------|-------|
| 18 <sup>+</sup>  | 2.38  | 1.43  | 0.19  |
| 19 <sup>+</sup>  | 2.21  | 1.58  | 0.21  |
| 20 <sup>+</sup>  | 2.26  | 1.51  | 0.23  |
| Average          | 2.28  | 1.51  | 0.21  |

| 20 $\mu\text{M}$ | $C_0$ | $C_1$ | $C_2$ |
|------------------|-------|-------|-------|
| 18 <sup>+</sup>  | 1.70  | 1.80  | 0.50  |
| 19 <sup>+</sup>  | 1.67  | 1.87  | 0.45  |
| 20 <sup>+</sup>  | 1.75  | 1.77  | 0.48  |
| Average          | 1.71  | 1.81  | 0.48  |

| 30 $\mu\text{M}$ | $C_0$ | $C_1$ | $C_2$ |
|------------------|-------|-------|-------|
| 18 <sup>+</sup>  | 1.08  | 1.91  | 1.01  |
| 19 <sup>+</sup>  | 1.08  | 1.98  | 0.95  |
| 20 <sup>+</sup>  | 1.12  | 1.79  | 1.09  |
| Average          | 1.09  | 1.89  | 1.02  |

| 40 $\mu\text{M}$ | $C_0$ | $C_1$ | $C_2$ |
|------------------|-------|-------|-------|
| 18 <sup>+</sup>  | 0.82  | 1.66  | 1.52  |
| 19 <sup>+</sup>  | 0.91  | 1.79  | 1.30  |
| 20 <sup>+</sup>  | 0.88  | 1.67  | 1.45  |
| Average          | 0.87  | 1.71  | 1.42  |

| 50 $\mu\text{M}$ | $C_0$ | $C_1$ | $C_2$ |
|------------------|-------|-------|-------|
| 18 <sup>+</sup>  | 0.28  | 1.51  | 2.21  |
| 19 <sup>+</sup>  | 0.29  | 1.60  | 2.11  |
| 20 <sup>+</sup>  | 0.30  | 1.38  | 2.32  |
| Average          | 0.29  | 1.50  | 2.22  |

| 100 $\mu\text{M}$ | $C_0$ | $C_1$ | $C_2$ |
|-------------------|-------|-------|-------|
| 18 <sup>+</sup>   | 0.14  | 1.48  | 2.38  |
| 19 <sup>+</sup>   | 0.14  | 1.54  | 2.33  |
| 20 <sup>+</sup>   | 0.12  | 1.22  | 2.66  |
| Average           | 0.13  | 1.41  | 2.46  |
